# Supplementary material for: Implementation and clinical benefit of DPYD genotyping in a Danish cancer population
Source: PubMed Central journal article supplement (PMC10024141; doi:10.1016/j.esmoop.2023.100782), 2023-02-13

**Figure S1.** Overview of included patients in the study. All patients was treated in Odense, Denmark

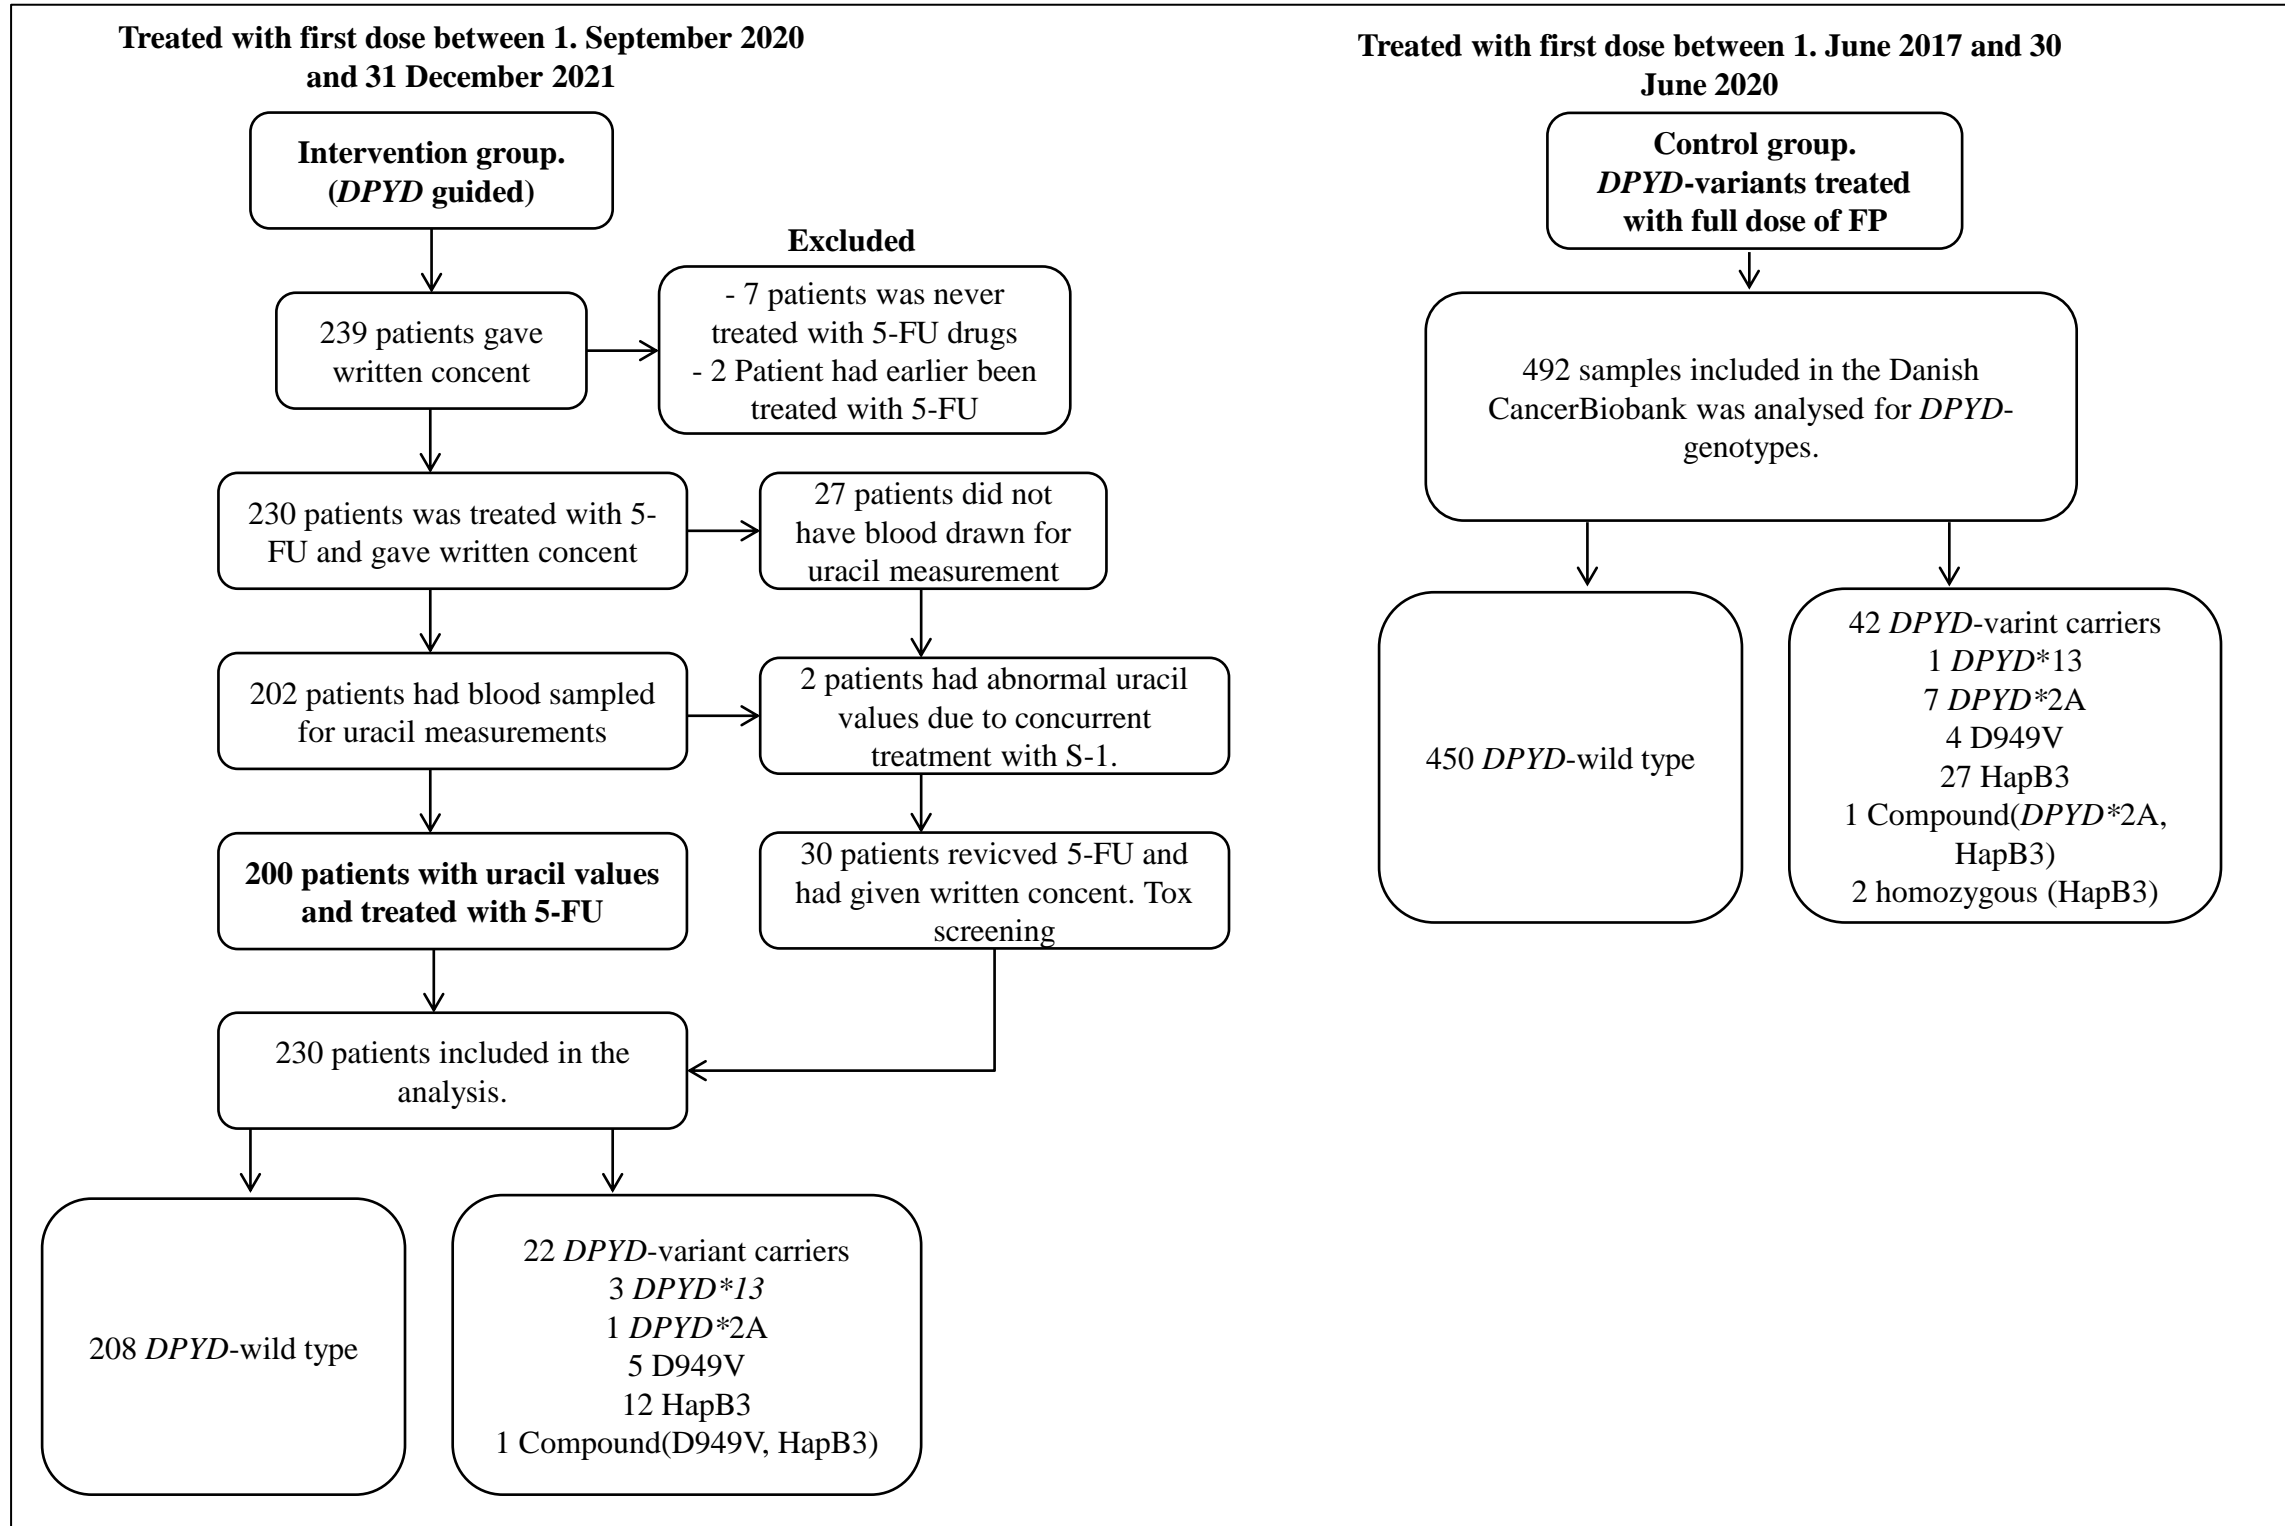

Supplement: mmc1.pdf [file mmc1.pdf]
