# Supplementary material for: Implementation and clinical benefit of DPYD genotyping in a Danish cancer population
Source: PubMed Central journal article supplement (PMC10024141; doi:10.1016/j.esmoop.2023.100782), 2023-02-13

**Figure S2.** Uracil concentration of all patients with grade  $\geq 3$  FP-related toxicity compared to all patients without toxicity. *DPYD* variant carriers treated with 50% starting dose.

Difference non-significant (p-value=0.2) (Wilcoxon rank sum test)

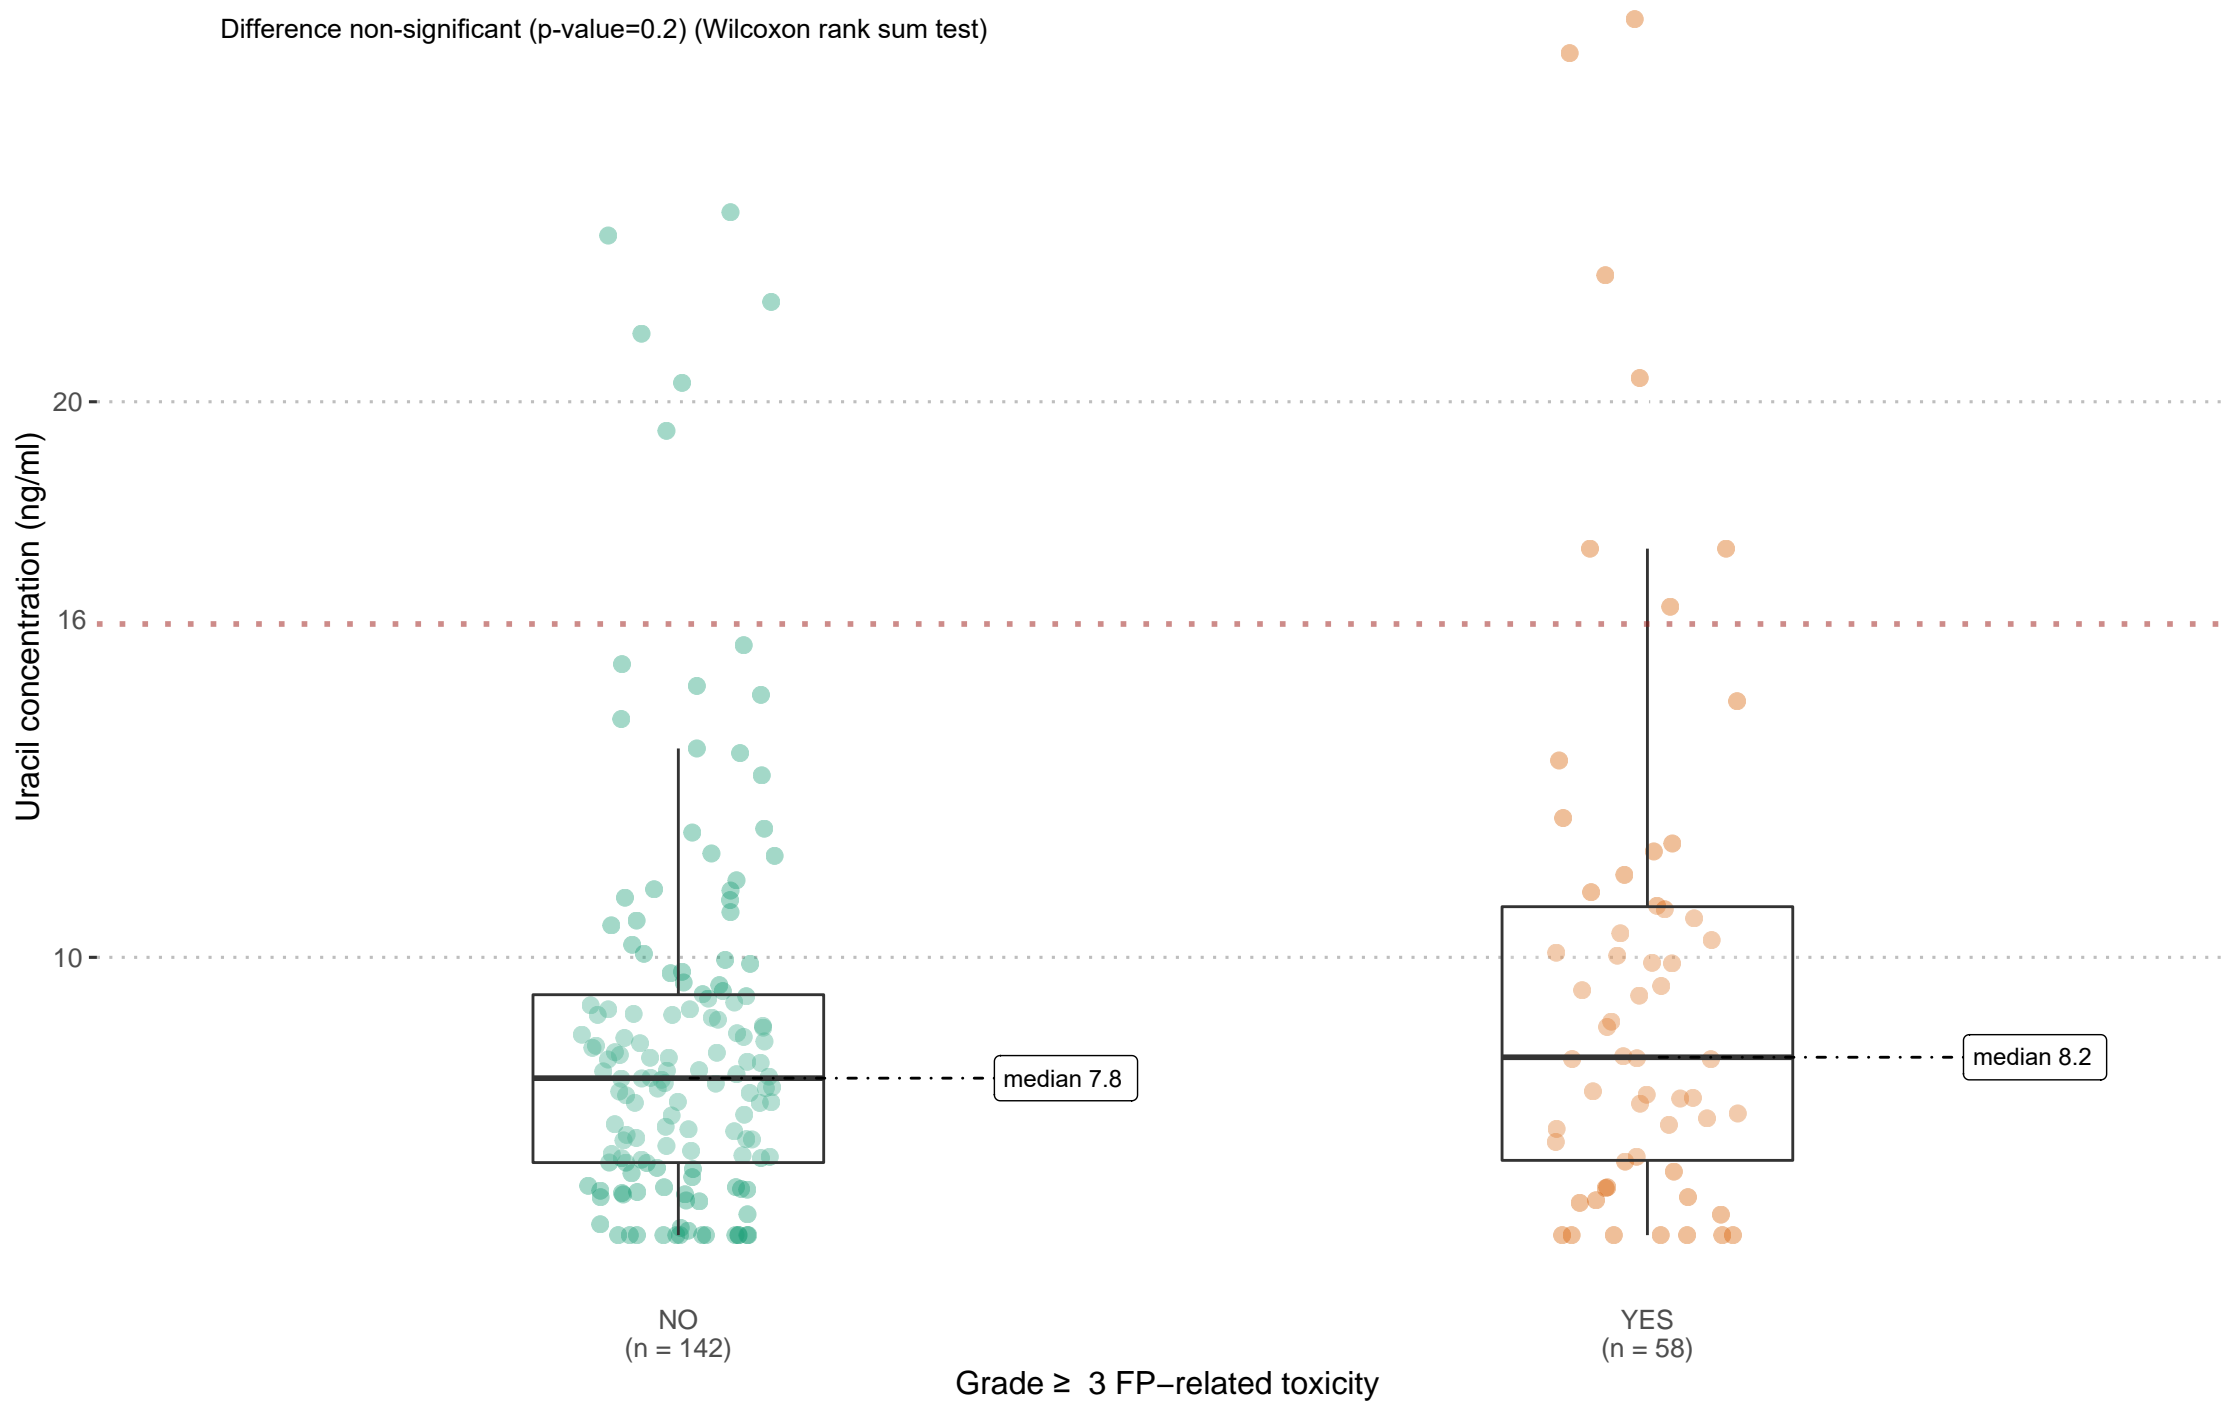

Supplement: mmc2.pdf [file mmc2.pdf]
