# Supplementary material for: Implementation and clinical benefit of DPYD genotyping in a Danish cancer population
Source: PubMed Central journal article supplement (PMC10024141; doi:10.1016/j.esmoop.2023.100782), 2023-02-13

**Figure S3.** Uracil concentration of *DPYD* variant carriers with grade  $\geq 3$  FP-related toxicity compared to *DPYD* variant carriers without toxicity. *DPYD* variant carriers was treated with 50% starting dose.

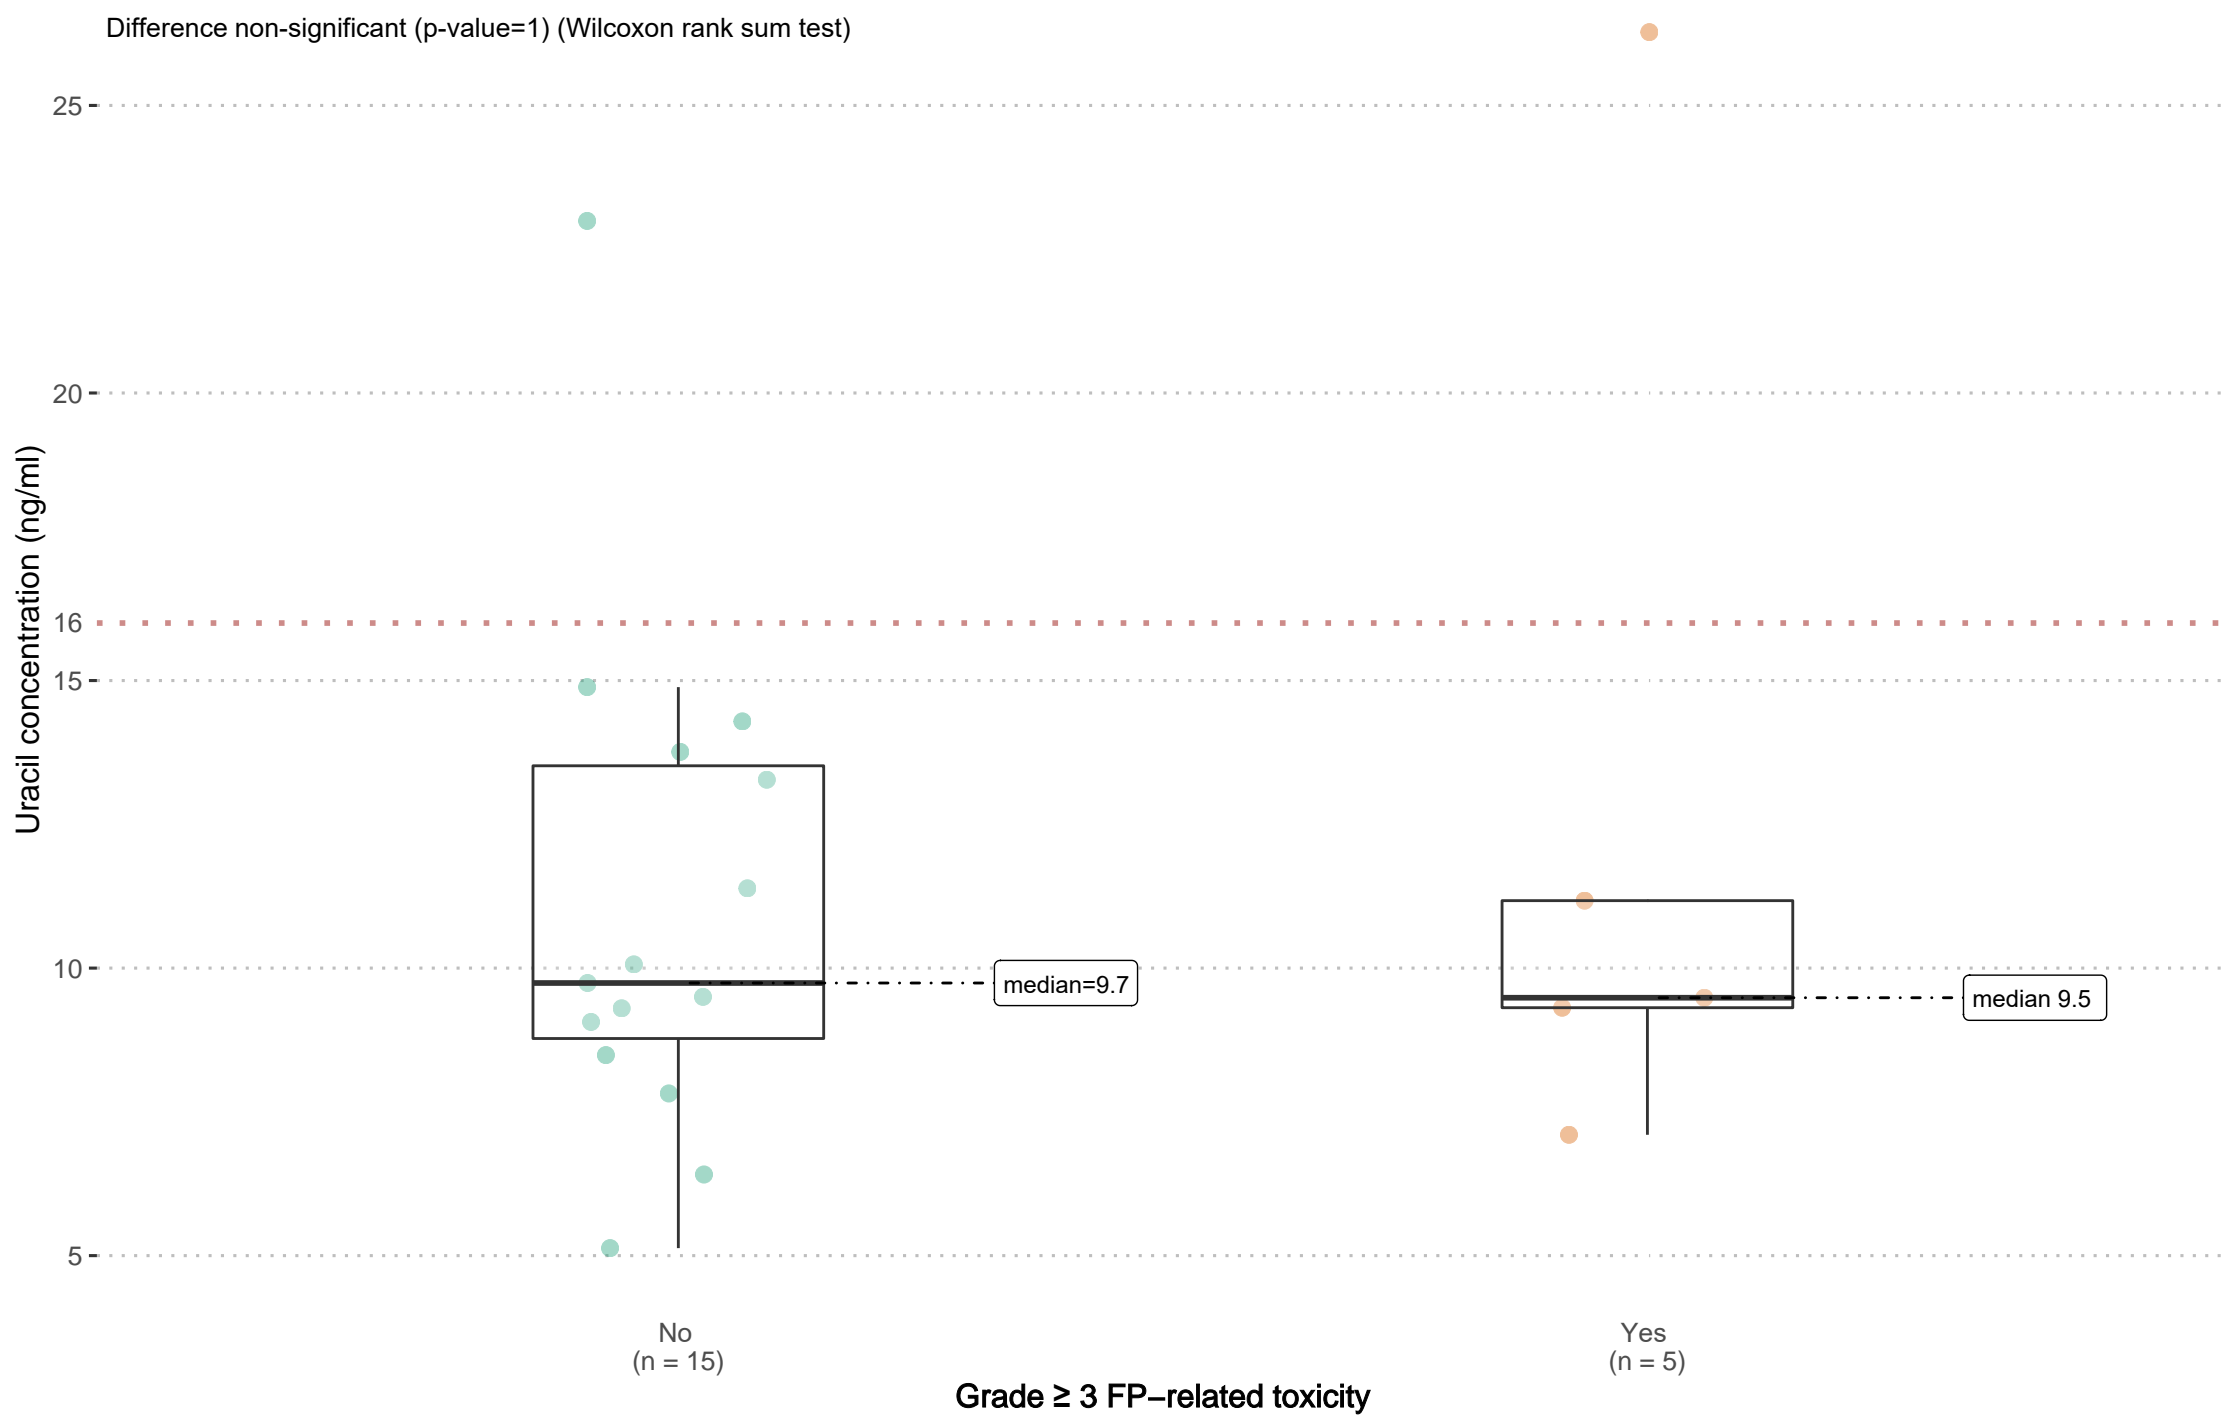

Supplement: mmc3.pdf [file mmc3.pdf]
