# Supplementary material for: Implementation and clinical benefit of DPYD genotyping in a Danish cancer population
Source: PubMed Central journal article supplement (PMC10024141; doi:10.1016/j.esmoop.2023.100782), 2023-02-13

**Figure S4.** Uracil distribution across specific *DPYD*-variants carriers and wild type patients

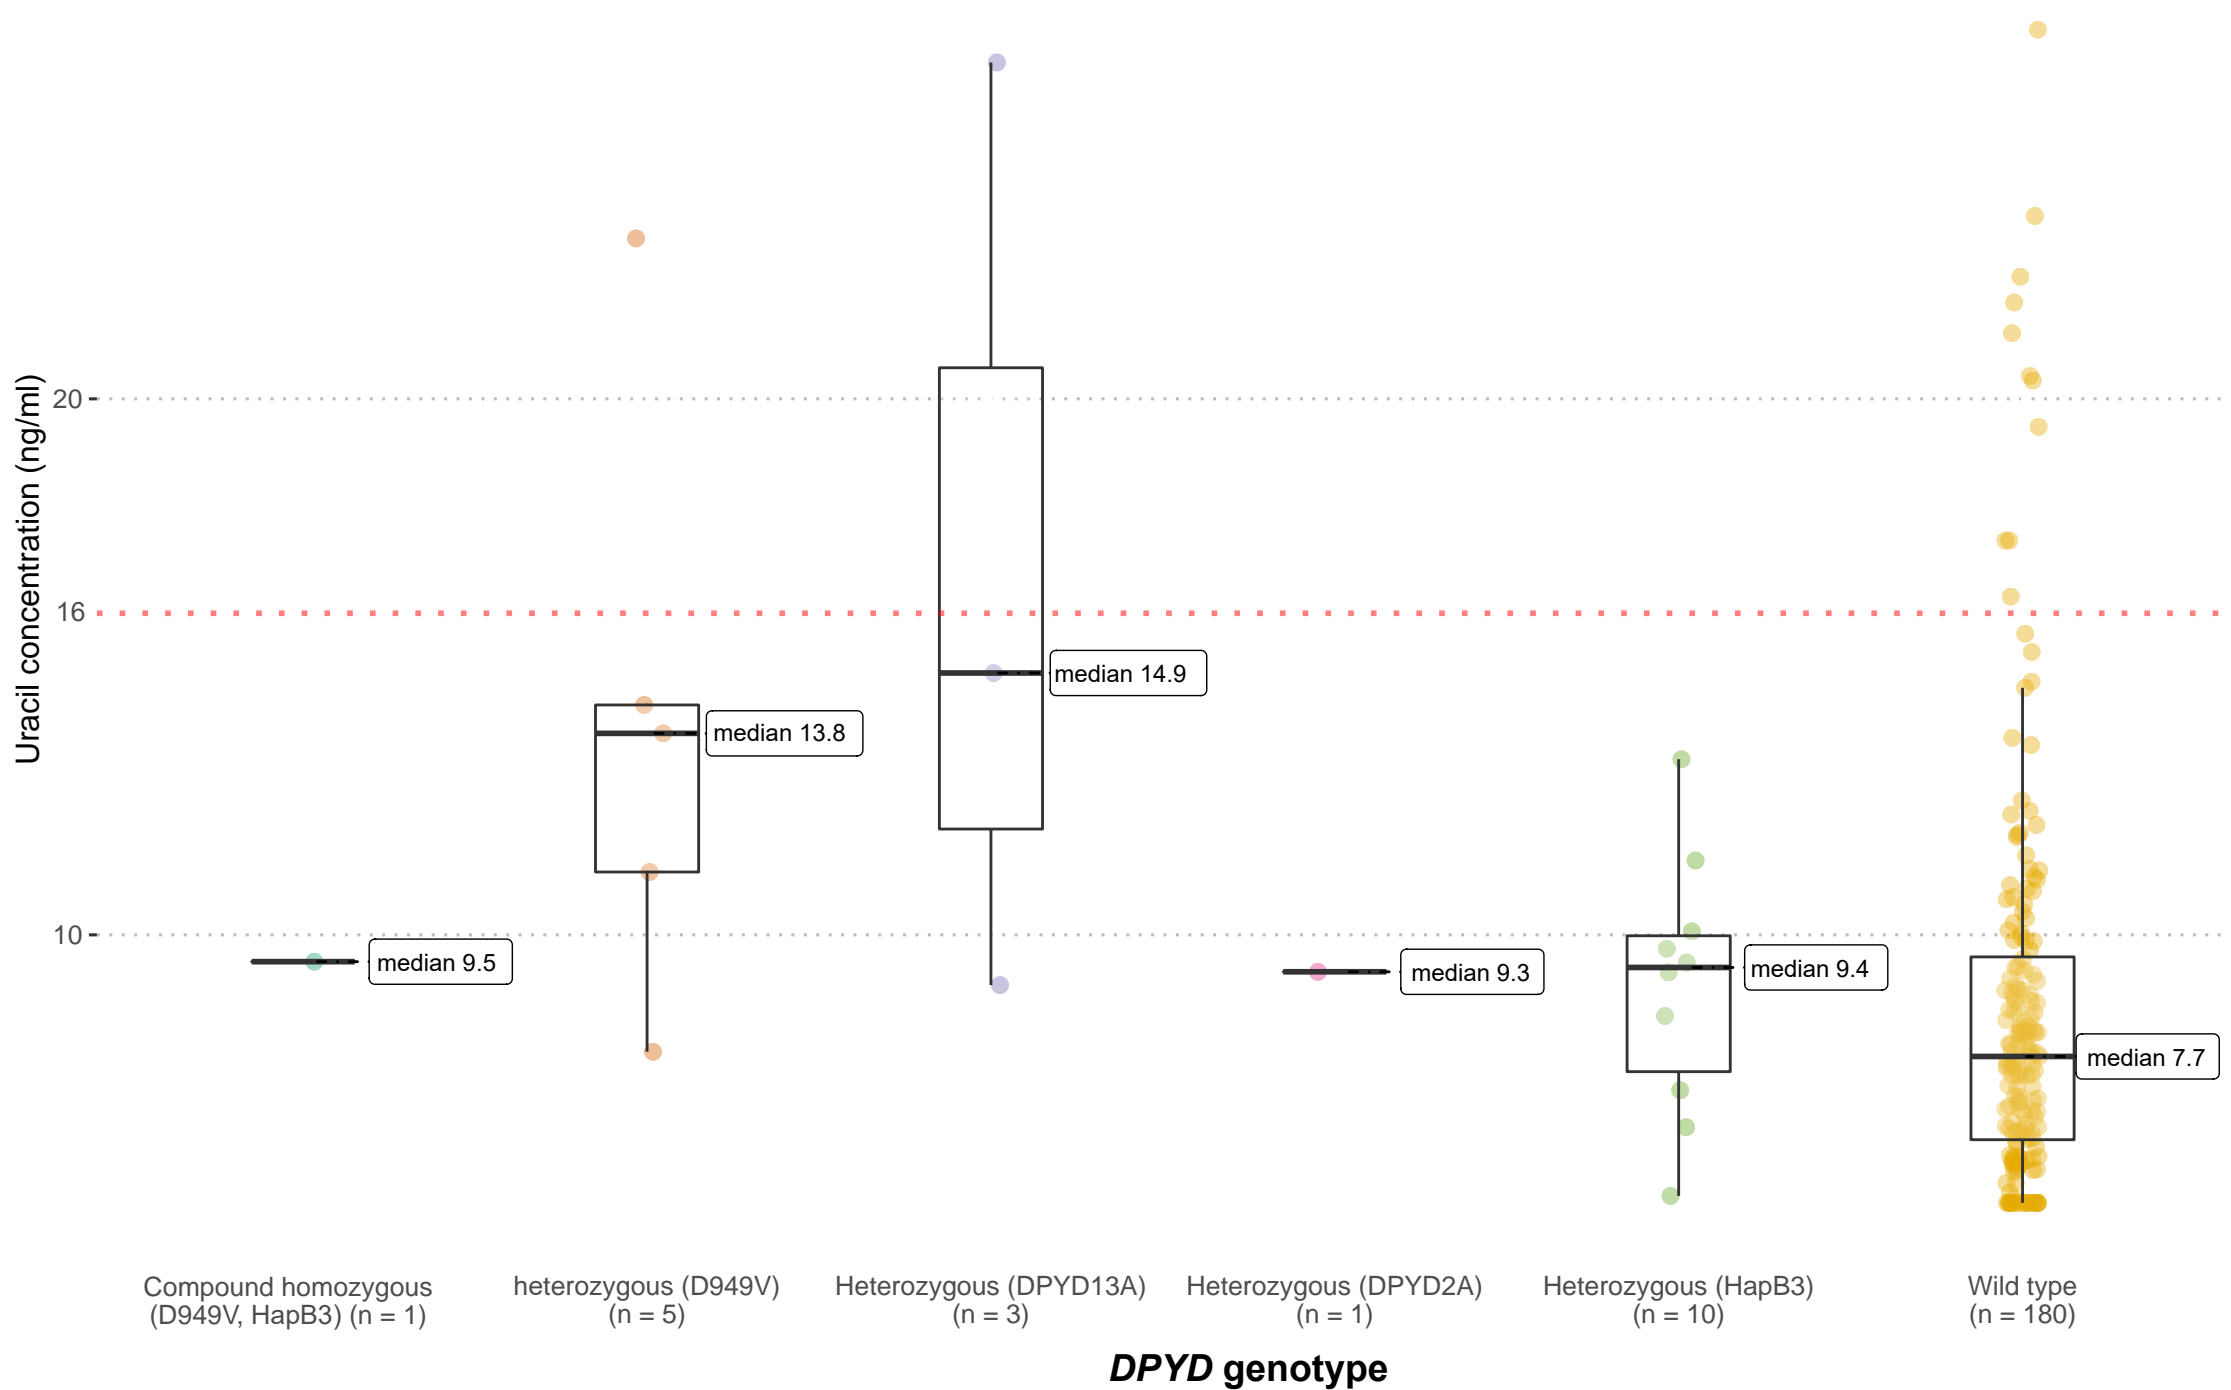

Supplement: mmc4.pdf [file mmc4.pdf]
